# Supplementary material for: Disparate expression specificities coded by a shared Hox-C enhancer
Source: eLife. 2020 Apr 28;9:e39876. doi: 10.7554/eLife.39876 (PMC7188484; doi:10.7554/eLife.39876)
Supplement: Figure 5—figure supplement 2—source data 1. [file elife-39876-fig5-figsupp2-data1.xlsx]

## Sheet: Amplification Data (RFU)
	Well/Cycles	A01	A02	A03	A04	A05	A06	A07	A08	A09	A10	A11	A12	B01	B02	B03	B04	B05	B06	B07	B08	B09	B10	B11	B12	C01	C02	C03	C04	C05	C06	C07	C08	C09	C10	C11	C12	D01	D02	D03	D04	D05	D06	D07	D08	D09	D10	D11	D12
	0.65	-15.4298	-2.754	-8.70969	-1.31619	-7.74332	-7.42731	-7.16307	-6.72604	-5.36049	-6.43856	-3.25409	-4.55376	-8.60522	8.74737	8.52948	6.15531	-5.83314	-11.8718	3.95269	4.09665	3.05228	4.79183	1.68211	-7.96516	-43.2688	-18.0648	4.92559	16.7805	16.5373	-10.2906	13.3361	11.0188	10.4691	12.8134	15.6069	-7.70333	-2.57979	-34.3196	19.3552	15.7879	12.0216	12.0099	12.8773	9.13379	8.59748	10.6932	8.24152	-6.56377
	1.65	-7.4964	-2.07783	-1.93437	-0.76632	-3.78533	-3.08761	-3.16692	-3.65609	-2.06373	-1.72933	-0.724218	-1.98975	-2.94702	3.7227	3.73891	2.61386	-6.12859	-8.49881	1.31861	1.17218	0.928133	1.53625	1.38878	-2.89505	-39.385	-18.8059	-0.549667	7.42064	6.59732	-7.33992	5.26181	3.8701	4.85755	5.83231	6.62095	0.855379	5.60131	-60.1373	8.05583	7.32909	7.14124	6.34368	7.32816	4.90113	5.72287	4.49767	3.7355	2.63282
	2.59091	1.37817	0.520859	1.77991	-0.285304	0.742119	-0.138707	1.10315	0.166637	0.317589	0.144138	1.66554	0.158222	0.821767	2.23766	2.37206	2.43133	-4.24151	-3.83384	1.7034	0.881104	1.56198	1.70577	2.34902	1.72398	-31.5293	-5.48249	4.46673	6.96878	5.16458	-1.42943	4.41252	4.17119	4.7476	3.49725	6.29318	5.03783	7.063	-63.6917	6.28089	6.16895	6.79915	5.536	5.25299	3.87732	5.96556	5.58848	3.85098	4.77937
	3.65	2.07109	2.9351	0.961312	0.0187047	0.95537	1.66698	1.81261	1.33244	0.213373	1.79203	0.246856	0.593228	1.9376	1.3466	1.57625	2.31694	-1.42568	-2.41918	0.540205	0.275753	-0.00630862	0.188898	0.283038	0.669528	-22.0838	4.60935	2.32859	3.67162	3.50232	-0.232914	1.61185	0.537612	3.08	1.27276	3.31337	2.82856	4.60627	34.6361	3.9544	3.88277	4.22402	3.21731	1.91086	3.36409	3.57847	1.73936	3.29069	2.29769
	4.59091	3.98709	1.5154	1.59041	2.12088	1.52932	1.34009	3.00785	1.77676	1.44194	0.754227	-0.777757	2.23986	1.64244	1.08453	1.6419	0.958977	0.142756	0.77721	1.17973	1.70215	0.860972	1.12277	0.37286	0.774706	18.0098	7.5491	3.94995	3.53492	3.49349	1.5685	1.83777	2.30701	2.23339	1.82838	3.61501	3.09282	3.46339	28.4702	3.52333	3.84065	2.74941	3.17268	2.78657	1.93719	1.73101	3.69108	2.02583	1.31722
	5.65	1.39479	1.07761	1.61527	1.64764	2.44569	2.93108	1.22719	1.856	0.728417	1.05167	0.163298	0.901541	1.63154	1.08213	0.771952	1.53824	2.01115	2.46033	0.214602	-0.179484	0.886513	0.809817	0.0592058	0.951214	17.0186	7.54505	2.21007	2.97667	2.17841	0.615952	2.17979	1.27119	1.05851	1.40394	0.641536	2.00999	3.5202	25.4615	2.59343	2.07363	2.38974	1.70262	2.76754	2.33057	1.99366	3.39718	0.962328	1.3087
	6.65	1.30624	-0.298049	-1.05908	1.39763	2.98488	1.18976	-0.00567045	1.56443	1.94345	0.383669	0.128431	1.93166	2.05808	-0.814136	-0.515493	-0.629335	3.24427	2.8828	0.635569	0.493639	0.00162806	0.999361	0.195961	1.27531	14.0943	5.06092	1.72173	-0.235547	-0.352187	-1.09743	-0.986079	1.58477	0.417638	2.06511	0.0943593	2.65679	-0.389544	20.4278	-1.08629	-0.408629	-0.59368	0.134455	-0.671377	0.31164	0.0585059	1.64301	0.938822	1.14538
	7.65	2.98744	-0.454857	0.0249808	1.45844	1.78898	-0.639959	-0.898487	0.635287	-0.284077	0.306651	-1.11495	-0.000576111	1.45786	1.54109	0.27443	0.484873	4.37977	4.74582	0.285137	-0.524967	0.130126	-1.20285	-0.21137	0.447692	18.9594	5.82536	4.47385	2.06251	1.18886	3.37638	1.29989	1.03602	0.551853	0.0316259	0.0715795	1.42988	0.361676	22.7889	1.68021	0.109769	1.16495	1.12016	1.14658	0.496409	0.112452	-0.143853	0.850663	0.826938
	8.65	-0.055431	-1.13753	-0.752064	-0.522748	-0.698982	-1.68773	-2.82216	1.05327	-0.550333	-0.492611	1.3881	-1.28249	0.934746	0.169757	-0.608228	0.107534	2.78538	3.44741	-0.228422	-0.988317	0.905277	-1.08785	0.055369	1.67913	16.0217	4.6184	1.6388	-2.45411	-2.01922	6.08765	-1.96369	-0.136236	-0.568373	0.41109	-1.42524	0.298333	-1.31709	18.1245	-1.72515	-1.96162	-1.78867	-0.278995	-1.84975	-1.17158	-0.917873	-2.6856	-0.290488	0.764466
	9.59091	1.06556	1.46933	1.22936	-1.57972	-3.27958	0.967781	-0.699775	-1.10377	-0.0171092	0.43624	-0.682541	-1.87417	0.894369	-0.665183	-0.0476832	-0.793673	3.15549	3.34458	0.301445	0.59228	-0.350336	0.0333154	-0.246736	1.21621	14.6833	5.14595	2.16304	-1.00109	-0.099739	6.99475	1.65177	0.347419	-0.146034	0.188614	-0.0827757	-0.950388	-0.649797	16.5094	-1.09811	-0.939258	0.0796583	0.0575757	0.219517	0.643924	0.137822	-1.71598	0.373357	-0.941357
	10.5909	-2.30421	-1.71842	-1.2868	-1.7818	-0.178157	0.164885	-0.329662	-0.0699155	0.810811	-1.8262	0.499849	-1.04137	0.736076	-0.848434	-0.381855	-0.353576	2.51382	2.5287	0.64698	-0.0995016	-0.0535702	0.409076	0.912668	-0.0814329	15.2728	4.58362	2.27386	-1.50524	-0.141612	7.50362	0.676714	0.200712	1.5742	-0.347134	-0.846913	-0.948717	-1.3542	14.5932	-2.36941	-1.70735	-1.26751	-1.02512	-0.992132	-0.49594	-0.457989	-0.721793	-0.562646	-0.535113
	11.5909	-1.1093	-1.77537	-1.05532	-0.231903	-0.647924	-1.3638	1.73608	-1.91517	-0.417534	0.854998	0.396072	0.906917	-0.462985	-1.43477	-1.00742	-1.26824	1.45797	2.20034	-0.987208	0.859878	0.319123	-0.198407	0.394384	0.492371	11.9091	5.46948	1.51735	-1.7912	-1.33339	5.41358	-0.218932	0.641586	-0.429656	0.845866	-1.46512	-0.855137	-0.720209	9.33794	-2.26281	-1.44981	-0.303254	-1.76273	-0.950819	0.0152632	-0.528467	-0.185713	0.0562881	-0.860642
	12.5909	-1.25139	2.67493	1.65661	1.68559	0.798073	2.72191	0.421956	1.76063	-0.867639	-0.757834	-0.266016	0.747013	-0.306053	-0.95862	-0.990548	-0.650326	2.17466	3.04516	-0.416116	-0.3513	0.126412	-1.36689	-0.720901	-0.357497	11.6007	5.25796	1.48256	-0.141069	0.0171664	6.70148	0.965158	0.739665	-1.02388	-1.25877	-2.44132	-1.64312	-1.41805	5.83012	0.036682	-0.181424	-1.21408	-1.00671	1.06804	0.112961	-0.250495	-1.1376	-1.14401	0.117899
	13.5909	3.92456	4.70673	4.60016	4.51858	4.38458	2.23329	4.90779	8.50601	5.08799	4.63111	4.49422	7.87005	-1.96354	-3.06852	-2.13388	-1.41071	0.173444	0.50679	-0.227277	0.819654	0.397663	1.37382	1.12945	0.707865	6.20608	0.162392	-2.41505	-2.80396	-2.54556	0.775883	-1.0802	1.85653	0.89329	1.95542	0.895155	-0.624395	-3.32695	1.61433	-3.87839	-3.0124	-5.61582	-4.16519	-3.90904	-1.0563	-0.281709	1.0562	0.810116	0.374283
	14.5909	18.0336	18.9596	16.7714	16.2692	10.4713	15.5944	14.077	17.5388	9.39028	12.4503	8.623	9.01945	-0.481991	0.116701	-0.610924	-1.22272	0.719957	1.69243	-0.505147	-0.706599	-0.538777	-0.975152	-0.191444	-0.915364	8.17926	2.71999	0.635749	0.396368	-0.32297	3.01873	0.346068	-0.591132	0.2202	-0.544864	-1.84879	0.422793	-1.50256	0.310738	-0.367108	-0.617419	-0.474573	0.583859	-0.528361	0.100706	-0.23802	-1.7308	-1.13913	-1.7801
	15.5909	43.2486	41.1658	38.0296	32.5988	27.606	29.4536	33.5862	31.1063	25.2747	27.0558	25.5866	22.662	-0.217338	-0.875805	-1.79869	-1.06967	0.682139	1.29469	-0.759685	-0.870488	-0.505483	-0.181488	-0.79578	-1.63162	4.99682	1.40555	0.368767	-0.22059	0.550984	2.33709	0.648947	0.763125	-0.213384	-0.85792	-0.0404485	-1.18159	-0.0776812	-2.74286	-1.2522	-0.0300867	-0.331804	-0.0295776	0.216819	0.134083	-0.864988	-0.194447	-0.399238	-0.995715
	16.5909	87.4992	83.9167	71.8765	67.7389	60.5247	62.3557	73.5664	66.7619	53.1289	53.668	49.2201	43.7996	-0.53722	-0.93359	-0.98261	-1.49134	0.810817	0.66399	-0.342957	-0.482662	-0.64236	-0.546709	-1.38659	-0.670984	2.47999	0.0954385	-0.670792	-0.769003	0.978093	1.46466	1.45706	-0.174981	-0.896383	-0.200321	-0.861814	-1.17069	-1.98172	-4.56888	-0.332047	-1.32477	-0.676387	-0.204701	0.317053	0.826097	-0.80002	-1.02676	-0.518851	-1.29251
	17.5909	162.371	151.312	136.483	127.639	117.002	117.2	137.548	128.651	101.197	100.364	97.4605	80.6538	-1.03229	-1.13055	-0.355908	-0.930648	0.0384348	-0.845442	-0.629878	-1.29131	-1.06076	-0.955349	-0.328702	-0.254913	1.93053	-0.101378	1.767	-0.00867312	0.22519	2.10541	-0.327182	-0.278302	-1.00071	-1.40799	-1.28019	-0.683053	-0.323458	-7.19887	0.00136975	0.177274	-1.85379	-0.36239	0.720811	-0.106383	-1.3748	0.000968957	-0.291395	0.128372
	18.5909	265.433	244.631	223.562	210.982	199.247	200.944	225.636	208.881	171.926	170.286	164.177	135.599	-0.878627	-0.862673	-1.07118	-1.18792	0.0348216	-0.588518	-0.884763	0.0492734	-0.478587	-0.746437	-1.09021	-0.839521	-0.121686	0.591043	0.326646	0.336152	0.657548	0.296878	-0.143565	0.14974	0.097044	-0.695374	-1.26679	-0.631274	0.733958	-9.44467	1.3887	0.772005	0.686139	1.10677	2.01996	1.21446	1.81594	0.0910298	-0.00183267	-0.228667
	19.5909	398.695	368.045	337.209	320.59	306.341	306.475	333.095	309.764	265.423	257.121	263.784	210.722	-1.14852	-1.00546	-1.64121	-0.906528	-0.460428	-0.281931	0.147282	0.582497	-0.397137	0.236958	-1.25785	0.467855	-1.81275	-0.671724	-0.80763	-0.347245	-0.0311783	0.121937	-0.41282	0.814733	0.187469	-0.912026	0.436722	-0.45429	2.11757	-10.9543	1.1628	1.95074	1.60425	1.49791	2.81761	2.72654	2.36386	3.1196	2.58764	1.6296
	20.5909	540.362	495.051	479.6	450.898	430.944	430.59	457.758	427.56	376.804	371.174	380.516	302.373	-0.687558	0.227972	-0.234868	-0.0166059	-0.964483	-1.61388	-0.397806	0.360344	-0.747894	0.14595	-1.089	-1.00209	-3.86745	-0.215258	1.34948	2.45282	2.72178	3.05524	2.11351	0.125284	0.441787	-0.482567	-0.562761	-0.677563	7.23768	-7.91788	6.99711	5.87645	7.94529	5.69577	8.32859	5.9516	4.5049	4.20705	3.18699	3.89099
	21.65	690.297	630.929	622.543	581.652	560.717	557.37	585.863	547.066	499.984	485.611	503.653	407.635	-0.66323	-0.0558377	0.0652163	-0.202104	-2.04914	-2.36941	0.256988	0.200477	0.542361	-0.00253581	-1.12963	-0.56266	-7.68416	-2.3255	-1.34082	-0.587331	0.0234525	-2.68642	-0.500007	-0.760503	-1.2635	-1.6485	-1.34764	-1.47393	9.64876	-8.61763	9.37659	9.06361	9.78108	7.7038	10.0634	9.92844	7.01344	6.66447	5.69681	5.79676
	22.5909	827.05	749.603	758.182	703.376	681.232	678.984	704.633	656.344	616.986	590.606	625.478	512.822	1.05145	1.05573	1.44805	1.51618	-1.76417	-1.74524	1.82212	2.82829	1.88607	1.69203	0.501642	0.684599	-7.08796	-1.15536	0.943627	1.87237	2.05556	-0.862326	3.10941	1.62421	0.663384	0.122383	-0.936474	-0.940286	25.304	6.96344	20.5696	20.6701	22.6168	21.6257	26.1749	24.2348	19.3456	17.2223	15.3893	14.7108
	23.65	942.256	852.62	875.271	811.911	791.201	787.964	816.068	757.44	723.778	688.601	734.219	608.57	1.45045	3.14083	3.20618	3.10834	-0.606281	-1.20215	3.83619	4.83695	3.10094	2.97509	0.535532	-0.378131	-8.4821	-2.95773	-0.619305	1.32712	0.477143	-4.2779	2.37738	1.72339	0.69207	-0.773899	-0.00206894	-0.652713	42.1895	29.7504	37.3982	36.769	38.5226	38.699	45.5339	42.8318	34.957	31.607	28.3545	25.8138
	24.65	1043.81	936.633	971.216	904.325	881.49	881.379	898.677	836.097	804.761	766.657	826.444	688.176	4.591	5.80687	6.26745	5.91646	1.25302	1.26478	10.1531	11.1777	8.43837	8.90625	6.7146	3.9754	-9.69565	-2.96545	-0.0759616	2.44125	0.170214	-6.76536	3.90876	6.34135	4.1883	5.82809	3.53982	2.67312	78.2379	72.914	65.1474	65.9444	70.2925	68.9427	80.9794	79.8408	67.9167	64.0473	56.221	51.167
	25.5909	1121.79	1005.13	1046.07	980.843	955.45	955.949	967.864	902.178	879.821	827.42	904.244	750.604	13.8962	15.6794	16.9369	14.5555	11.1422	11.0997	20.126	20.2919	15.5921	14.7293	9.44581	7.77752	-0.860799	6.72321	10.9668	10.0392	8.99415	2.43966	14.0253	12.0953	7.45271	8.86663	4.72613	4.37548	149.01	162.938	128.79	129.186	140.955	138.424	155.457	147.961	126.295	115.63	103.467	95.6891
	26.65	1189.42	1064.09	1109.55	1042.35	1013.78	1017.83	1015.58	952.293	937.311	878.211	968.309	797.093	27.1429	28.2102	31.8638	28.8075	24.5508	24.411	36.7489	38.4622	30.2653	27.1423	17.3051	15.6082	5.64644	13.8683	18.9645	15.7988	14.455	5.97925	23.7202	19.6103	13.9253	15.3281	10.1502	8.29854	225.56	260.103	199.423	202.692	217.606	213.334	236.126	221.882	195.559	178.543	163.354	154.33
	27.65	1243.77	1106.74	1160.27	1091.44	1059.03	1064.91	1057.71	990.256	982.21	915.813	1019.6	840.368	52.704	53.2391	59.5601	54.9603	51.7262	52.2531	67.3557	69.166	57.1259	52.7835	34.1127	29.7446	25.3268	29.8118	39.0639	30.7169	25.9261	19.9253	43.2029	40.4196	26.0764	29.4225	17.7444	18.8938	334.137	406.13	300.016	300.046	323.405	313.959	341.293	324.01	291.358	269.458	250.173	232.325
	28.65	1292.52	1145.89	1204	1130.99	1103.64	1110.37	1090.55	1019.65	1014.25	952.711	1058.98	875.179	94.7022	96.2638	107.168	100.628	99.8731	100.007	119.516	121.421	102.285	94.0086	64.032	56.4148	59.1402	60.5134	75.3165	56.7856	49.5027	47.4823	79.3214	72.4853	49.4957	56.8138	31.5832	35.2743	472.069	569.475	430.077	431.568	465.398	450.866	480.268	453.176	414.724	384.378	358.209	330.152
	29.65	1341.73	1174.15	1236.39	1160.85	1138.38	1149.94	1125.87	1048.19	1045.77	980.184	1097.16	909.919	159.188	157.669	179.256	168.341	175.288	174.445	194.165	193.602	169.4	156.169	114.222	98.6728	117.412	116.828	131.364	100.872	89.5409	94.7725	136.729	124.044	90.7849	97.7102	59.8953	65.3169	616.386	751.431	568.566	570.523	610.744	589.201	618.421	584.715	545.939	509.115	476.804	447.552
	30.65	1377.26	1197.94	1264.95	1186.61	1169.73	1177.54	1154.82	1075.8	1075.02	1008.61	1124.13	933.14	240.014	237.135	267.69	252.112	274.396	272.903	292.218	283.349	259.752	241.432	185.739	160.356	197.319	189.084	209.556	160.005	144.978	161.949	212.457	201.362	153.741	166.241	107.791	116.376	763.339	934.877	714.904	715.438	762.851	732.202	760.071	715.587	679.376	635.629	600.829	566.063
	31.65	1415.04	1224.47	1291.28	1208.47	1192.23	1192.92	1179.77	1096.08	1098.75	1033.47	1146.32	955.765	344.713	340.347	394.333	373.212	418.349	414.785	422.747	402.253	379.677	337.423	269.171	235.303	306.631	295.604	318.46	248.32	229.314	264.683	313.27	287.385	230.171	241.947	162.459	177.805	900.56	1106.74	855.227	855.326	907.378	865.174	890.532	837.052	805.773	757.484	720.303	683.378
	32.5909	1438.58	1248.03	1313.97	1234.03	1215.62	1206.45	1190.86	1109.41	1115.97	1054.4	1159.84	980.27	474.252	462.593	525.086	497.325	571.177	564.903	557.606	521.733	505.851	464.741	387.867	340.618	457.45	435.051	467.414	359.181	344.713	404.561	443.731	410.454	340.46	353.709	244.893	269.254	1013.86	1250.17	975.869	973.621	1032.35	978.809	1001.98	936.772	911.981	859.409	821.773	783.336
	33.65	1460.41	1269.53	1329.38	1255.43	1229.09	1221.21	1202.75	1119.3	1126.72	1072.39	1183.16	998.901	596.971	580.724	659.961	624.38	734.46	723.526	694.165	639.473	637.313	585.124	507.223	444.338	613.857	582.857	619.922	475.436	466.195	555.536	574.222	533.394	458.004	468.176	337.123	372.046	1106.64	1366.23	1072.51	1070.18	1130.39	1068.06	1088.11	1015.83	999.301	945.512	906.456	866.261
	34.65	1475.13	1280.08	1338.07	1278.95	1237.23	1238.47	1216.12	1134.19	1138.14	1083.77	1200.54	1026.92	707.987	687.553	780.558	738.093	886.261	870.071	816.442	741.994	756.507	696.428	625.061	548.131	767.661	731.876	766.899	591.815	593.083	714.856	697.355	650.85	578.335	585.73	438.051	481.835	1175.84	1453.29	1144.29	1141.73	1202.8	1133.76	1148.6	1073.35	1067.34	1013.48	974.165	934.221
	35.65	1493.04	1293.21	1350.57	1299.81	1247.62	1253	1230.83	1144.34	1148.5	1095.27	1217.58	1031.96	813.54	788.23	892.606	845.314	1030.21	1008.22	926.333	833.464	863.44	796.089	736.292	648.119	919.006	881.819	909.97	708.233	724.351	880.801	813.15	760.049	696.288	697.185	544.546	597.188	1237.91	1528.7	1207.26	1203.98	1267.93	1192.57	1203.86	1124.81	1124.96	1070.14	1030.01	991.569
	36.5909	1508.25	1301.48	1364.85	1312.25	1257.49	1272.03	1244.28	1153.73	1165.05	1102.33	1223.85	1041.37	903.631	874.798	985.323	935.714	1150.35	1126.54	1018.74	909.829	953.361	879.696	829.83	734.976	1047.62	1011.49	1032.29	810.166	840.772	1028.91	909.183	851.629	796.486	792.89	641.972	700.031	1287.18	1591.63	1259.81	1253.48	1321.66	1240.27	1248.5	1166.75	1169.67	1115.33	1075.75	1039.05
	37.5909	1521.37	1314.44	1377.79	1320.52	1269.14	1289.07	1249.55	1158.46	1180.5	1107.74	1237.43	1027.5	979.47	947.185	1064.98	1011.17	1250.08	1223.42	1093.36	972.143	1024.64	946.573	904.617	807.338	1157.71	1123.26	1133.99	896.531	938.851	1154.33	988.369	924.705	878.36	868.026	724.466	786.862	1330.13	1642.79	1305.11	1296.92	1367.32	1282.98	1291.45	1203.38	1205.58	1151.47	1110.4	1073.59
	38.5909	1529.61	1322.31	1388.33	1329.04	1277.7	1304.69	1254.27	1166.48	1191.8	1112.09	1247.11	1032.98	1037.91	1004.19	1127.43	1069.71	1327.14	1300.02	1152.97	1021.64	1083.27	1001.77	965.479	867.71	1242.19	1209.04	1213.23	963.755	1016.02	1253.13	1050.85	981.679	942.209	929.339	792.877	856.934	1361.05	1682.72	1336.76	1330.01	1401.82	1314.81	1321.57	1231.03	1233.06	1179.75	1138.77	1103.26
	39.5909	1535.63	1330.07	1396.87	1342.89	1288.01	1315.43	1256.94	1174.52	1197.01	1116.88	1252.96	1041.31	1089.96	1053.05	1183.42	1121.72	1395.91	1367.5	1205.3	1064.68	1134.99	1051.92	1020.69	923.285	1314.42	1282.57	1281.44	1020.89	1083.6	1339.07	1106.62	1029.66	997.166	984.047	854.09	920.256	1385.96	1716.48	1361.23	1357.82	1433.25	1341.79	1346.22	1255.12	1258.91	1204.25	1163.01	1131.11
[truncated: 48 more columns]

## Sheet: Standard Curve_ Ct Results
	Well	Fluor	Type	Identifier	Replicate #	Threshold Cycle (Ct)	Ct Mean	Ct Std. Dev	Starting Quantity (SQ)	Log Starting Quantity	SQ Mean	SQ Std. Dev.	Set Point
	A01	SYBR	w1118 #1	rp49	1	17.8361	26.1812	4.69642	0	#NUM!	0	0	N/A									rp49 DCT				robl DCT				TBP DCT				nrv2 DCT				fold difference rp49				fold difference robl				fold difference TBP
	A02	SYBR	w1118 #1	rp49	2	17.9802	26.1812	4.69642	0	#NUM!	0	0	N/A		sample	gene	avg TR	sd TR		sample		value	avg biol rep	SD	ttest	value	avg biol rep	SD	ttest	value	avg biol rep	SD	ttest	value	avg biol rep	SD	ttest	value	avg biol rep	SD	ttest	value	avg biol rep	SD	ttest	value	avg biol rep	SD	ttest
	A03	SYBR	w1118 #2	rp49	1	18.1784	26.1812	4.69642	0	#NUM!	0	0	N/A		w1118 #1	rp49	17.9081	0.101902		w1118 #1	rp49	0	0	0	#DIV/0!	4.06949	4.19603	0.162451	0.565284	8.08462	8.03789	0.198264	0.313364	3.76382	3.63174	0.126454	0.747519	1	1	0	#DIV/0!	16.7895	18.4076	2.12209	0.5556	271.464	264.444	35.4196	0.30467
	A04	SYBR	w1118 #2	rp49	2	18.3108	26.1812	4.69642	0	#NUM!	0	0	N/A		w1118 #2	rp49	18.2446	0.0936556		w1118 #2	rp49	0				4.37922				8.20861				3.61961				1				20.8103				295.827
	A05	SYBR	w1118 #3	rp49	1	18.4498	26.1812	4.69642	0	#NUM!	0	0	N/A		w1118 #3	rp49	18.4409	0.0125463		w1118 #3	rp49	0				4.13938				7.82043				3.51178				1				17.623				226.04
	A06	SYBR	w1118 #3	rp49	2	18.4321	26.1812	4.69642	0	#NUM!	0	0	N/A		M2:20 #1	rp49	18.2429	0.117798		M2:20 #1	rp49	0	0	0		4.21144	4.12805	0.0835768		7.84356	7.88551	0.0554251		3.57385	3.60167	0.0788137		1	1	0		18.5255	17.5046	1.01344		229.693	236.586	9.17167
	A07	SYBR	M2:20 #1	rp49	1	18.1596	26.1812	4.69642	0	#NUM!	0	0	N/A		M2:20 #2	rp49	18.7749	0.022473		M2:20 #2	rp49	0				4.04429				7.86462				3.54054				1				16.4988				233.071
	A08	SYBR	M2:20 #1	rp49	2	18.3262	26.1812	4.69642	0	#NUM!	0	0	N/A		M2:20 #3	rp49	19.0551	0.323282		M2:20 #3	rp49	0				4.12843				7.94834				3.69062				1				17.4897				246.996
	A09	SYBR	M2:20 #2	rp49	1	18.759	26.1812	4.69642	0	#NUM!	0	0	N/A		w1118 #1	pb	30.0146	0.0177759		w1118 #1	pb	-12.1064	-11.6709	0.394235	0.451165	-8.03695	-7.47491	0.48677	0.625273	-4.02183	-3.63306	0.345899	0.730412	-8.34263	-8.03921	0.269728	0.362432	0.000226776	0.000314113	8.07947e-05	0.43987	0.00380747	0.00582254	0.00174528	0.640578	0.0615615	0.0820979	0.0184941	0.741416
	A10	SYBR	M2:20 #2	rp49	2	18.7908	26.1812	4.69642	0	#NUM!	0	0	N/A		w1118 #2	pb	29.8126	0.0958678		w1118 #2	pb	-11.568				-7.18876				-3.35937				-7.94837				0.000329375				0.00685438				0.0974382
	A11	SYBR	M2:20 #3	rp49	1	18.8265	26.1812	4.69642	0	#NUM!	0	0	N/A		w1118 #3	pb	29.7793	0.00663918		w1118 #3	pb	-11.3384				-7.19902				-3.51798				-7.82662				0.000386188				0.00680578				0.0872939
	A12	SYBR	M2:20 #3	rp49	2	19.2837	26.1812	4.69642	0	#NUM!	0	0	N/A		M2:20 #1	pb	29.565	0.00340856		M2:20 #1	pb	-11.3221	-11.4237	0.325956		-7.1107	-7.29565	0.315477		-3.47857	-3.5382	0.276861		-7.74829	-7.82204	0.247215		0.000390569	0.00037004	7.90827e-05		0.00723547	0.00646244	0.00131453		0.0897108	0.087118	0.0161485
	B01	SYBR	w1118 #1	pb	1	30.002	26.1812	4.69642	0	#NUM!	0	0	N/A		M2:20 #2	pb	29.9355	0.11825		M2:20 #2	pb	-11.1606				-7.11634				-3.296				-7.62009				0.000436834				0.00720722				0.101813
	B02	SYBR	w1118 #1	pb	2	30.0272	26.1812	4.69642	0	#NUM!	0	0	N/A		M2:20 #3	pb	30.8434	0.241308		M2:20 #3	pb	-11.7884				-7.65992				-3.84001				-8.09773				0.000282717				0.00494464				0.06983
	B03	SYBR	w1118 #2	pb	1	29.7448	26.1812	4.69642	0	#NUM!	0	0	N/A		w1118 #1	pb2	30.5795	0.0715184		w1118 #1	pb2	-12.6713	-12.56	0.126977	0.500458	-8.60182	-8.36399	0.288903	0.734327	-4.58669	-4.52213	0.282353	0.956226	-8.90749	-8.92828	0.137768	0.496387	0.000153305	0.000166031	1.47928e-05	0.445747	0.00257392	0.003077	0.000636748	0.70706	0.0416168	0.0440906	0.00885348	0.955909
	B04	SYBR	w1118 #2	pb	2	29.8804	26.1812	4.69642	0	#NUM!	0	0	N/A		w1118 #2	pb2	30.6663	0.419453		w1118 #2	pb2	-12.4217				-8.04248				-4.21309				-8.80209				0.000182261				0.0037929				0.0539179
	B05	SYBR	w1118 #3	pb	1	29.7746	26.1812	4.69642	0	#NUM!	0	0	N/A		w1118 #3	pb2	31.028	0.180866		w1118 #3	pb2	-12.587				-8.44766				-4.76662				-9.07527				0.000162525				0.00286417				0.0367371
	B06	SYBR	w1118 #3	pb	2	29.784	26.1812	4.69642	0	#NUM!	0	0	N/A		M2:20 #1	pb2	30.3974	0.106238		M2:20 #1	pb2	-12.1545	-12.394	0.344833		-7.94311	-8.26595	0.364229		-4.31098	-4.50849	0.289567		-8.5807	-8.79234	0.271625		0.00021934	0.000189197	4.19621e-05		0.00406338	0.00331636	0.000800849		0.0503808	0.044505	0.00839231
	B07	SYBR	M2:20 #1	pb	1	29.5626	26.1812	4.69642	0	#NUM!	0	0	N/A		M2:20 #2	pb2	31.0131	0.113754		M2:20 #2	pb2	-12.2382				-8.19394				-4.3736				-8.69769				0.000206979				0.00341489				0.0482407
	B08	SYBR	M2:20 #1	pb	2	29.5674	26.1812	4.69642	0	#NUM!	0	0	N/A		M2:20 #3	pb2	31.8443	0.131686		M2:20 #3	pb2	-12.7892				-8.66081				-4.8409				-9.09862				0.000141272				0.0024708				0.0348935
	B09	SYBR	M2:20 #2	pb	1	29.8519	26.1812	4.69642	0	#NUM!	0	0	N/A		w1118 #1	TBP	25.9928	0.18753		w1118 #1	TBP	-8.08462	-8.03789	0.198264	0.313364	-4.01513	-3.84185	0.167388	0.510628	0	0	0	#DIV/0!	-4.3208	-4.40615	0.15847	0.311801	0.00368373	0.00382936	0.000536852	0.323834	0.0618481	0.0700527	0.00806196	0.522333	1	1	0	#DIV/0!
	B10	SYBR	M2:20 #2	pb	2	30.0191	26.1812	4.69642	0	#NUM!	0	0	N/A		w1118 #2	TBP	26.4532	0.0284241		w1118 #2	TBP	-8.20861				-3.82939				0				-4.589				0.00338035				0.0703459				1
	B11	SYBR	M2:20 #3	pb	1	30.6728	26.1812	4.69642	0	#NUM!	0	0	N/A		w1118 #3	TBP	26.2614	0.0358978		w1118 #3	TBP	-7.82043				-3.68105				0				-4.30865				0.004424				0.0779641				1
	B12	SYBR	M2:20 #3	pb	2	31.0141	26.1812	4.69642	0	#NUM!	0	0	N/A		M2:20 #1	TBP	26.0864	0.103214		M2:20 #1	TBP	-7.84356	-7.88551	0.0554251		-3.63212	-3.75746	0.108542		0	0	0		-4.26971	-4.28384	0.0353652		0.00435364	0.00423094	0.000160993		0.0806532	0.0740838	0.00568928		1	1	0
	C01	SYBR	w1118 #1	pb2	1	30.5289	26.1812	4.69642	0	#NUM!	0	0	N/A		M2:20 #2	TBP	26.6395	0.156366		M2:20 #2	TBP	-7.86462				-3.82034				0				-4.32409				0.00429054				0.0707886				1
	C02	SYBR	w1118 #1	pb2	2	30.63	26.1812	4.69642	0	#NUM!	0	0	N/A		M2:20 #3	TBP	27.0034	0.104192		M2:20 #3	TBP	-7.94834				-3.81991				0				-4.25772				0.00404865				0.0708097				1
	C03	SYBR	w1118 #2	pb2	1	30.3697	26.1812	4.69642	0	#NUM!	0	0	N/A		w1118 #1	nrv2	21.672	0.0043885		w1118 #1	nrv2	-3.76382	-3.63174	0.126454	0.747519	0.305673	0.564295	0.233497	0.814745	4.3208	4.40615	0.15847	0.311801	0	0	0	#DIV/0!	0.073617	0.0808807	0.00703823	0.762486	1.23599	1.49134	0.233195	0.76466	19.9843	21.2894	2.40711	0.322339
	C04	SYBR	w1118 #2	pb2	2	30.9629	26.1812	4.69642	0	#NUM!	0	0	N/A		w1118 #2	nrv2	21.8642	0.0164652		w1118 #2	nrv2	-3.61961				0.75961				4.589				0				0.0813557				1.69303				24.0673
	C05	SYBR	w1118 #3	pb2	1	31.1559	26.1812	4.69642	0	#NUM!	0	0	N/A		w1118 #3	nrv2	21.9527	0.0966698		w1118 #3	nrv2	-3.51178				0.627601				4.30865				0				0.0876693				1.54499				19.8167
	C06	SYBR	w1118 #3	pb2	2	30.9001	26.1812	4.69642	0	#NUM!	0	0	N/A		M2:20 #1	nrv2	21.8167	0.0247727		M2:20 #1	nrv2	-3.57385	-3.60167	0.0788137		0.637591	0.526385	0.101793		4.26971	4.28384	0.0353652		0	0	0		0.0839779	0.0824552	0.00444549		1.55573	1.44272	0.102862		19.2891	19.4828	0.480491
	C07	SYBR	M2:20 #1	pb2	1	30.3223	26.1812	4.69642	0	#NUM!	0	0	N/A		M2:20 #2	nrv2	22.3154	0.142936		M2:20 #2	nrv2	-3.54054				0.503748				4.32409				0				0.0859394				1.41789				20.03
	C08	SYBR	M2:20 #1	pb2	2	30.4725	26.1812	4.69642	0	#NUM!	0	0	N/A		M2:20 #3	nrv2	22.7457	0.0628281		M2:20 #3	nrv2	-3.69062				0.437815				4.25772				0				0.0774485				1.35455				19.1295
	C09	SYBR	M2:20 #2	pb2	1	31.0935	26.1812	4.69642	0	#NUM!	0	0	N/A		w1118 #1	robl	21.9776	0.0747952		w1118 #1	robl	-4.06949	-4.19603	0.162451	0.565284	0	0	0	#DIV/0!	4.01513	3.84185	0.167388	0.510628	-0.305673	-0.564295	0.233497	0.814745	0.0595609	0.0547861	0.0059985	0.575278	1	1	0	#DIV/0!	16.1686	14.4035	1.67902	0.499675
	C10	SYBR	M2:20 #2	pb2	2	30.9327	26.1812	4.69642	0	#NUM!	0	0	N/A		w1118 #2	robl	22.6238	0.0971995		w1118 #2	robl	-4.37922				0				3.82939				-0.75961				0.0480532				1				14.2155
	C11	SYBR	M2:20 #3	pb2	1	31.9374	26.1812	4.69642	0	#NUM!	0	0	N/A		w1118 #3	robl	22.5803	0.254078		w1118 #3	robl	-4.13938				0				3.68105				-0.627601				0.0567442				1				12.8264
	C12	SYBR	M2:20 #3	pb2	2	31.7512	26.1812	4.69642	0	#NUM!	0	0	N/A		M2:20 #1	robl	22.4543	0.0604391		M2:20 #1	robl	-4.21144	-4.12805	0.0835768		0	0	0		3.63212	3.75746	0.108542		-0.637591	-0.526385	0.101793		0.0539797	0.0572556	0.00331614		1	1	0		12.3988	13.5492	0.99634
	D01	SYBR	w1118 #1	TBP	1	26.1254	26.1812	4.69642	0	#NUM!	0	0	N/A		M2:20 #2	robl	22.8192	0.100229		M2:20 #2	robl	-4.04429				0				3.82034				-0.503748				0.0606106				1				14.1266
	D02	SYBR	w1118 #1	TBP	2	25.8602	26.1812	4.69642	0	#NUM!	0	0	N/A		M2:20 #3	robl	23.1835	0.0833138		M2:20 #3	robl	-4.12843				0				3.81991				-0.437815				0.0571765				1				14.1224
	D03	SYBR	w1118 #2	TBP	1	26.4733	26.1812	4.69642	0	#NUM!	0	0	N/A		w1118 #2; 1:2	pb	31.0354	0.108744
	D04	SYBR	w1118 #2	TBP	2	26.4331	26.1812	4.69642	0	#NUM!	0	0	N/A		w1118 #2; 1:4	pb	31.8974	0.229121
	D05	SYBR	w1118 #3	TBP	1	26.236	26.1812	4.69642	0	#NUM!	0	0	N/A		w1118 #2; 1:8	pb	32.7813	0.167275
	D06	SYBR	w1118 #3	TBP	2	26.2867	26.1812	4.69642	0	#NUM!	0	0	N/A		w1118 #2; 1:2	pb2	32.323	0.279925
	D07	SYBR	M2:20 #1	TBP	1	26.0134	26.1812	4.69642	0	#NUM!	0	0	N/A		w1118 #2; 1:4	pb2	32.7564	0.283351
	D08	SYBR	M2:20 #1	TBP	2	26.1594	26.1812	4.69642	0	#NUM!	0	0	N/A		w1118 #2; 1:8	pb2	34.3621	0.207659
	D09	SYBR	M2:20 #2	TBP	1	26.5289	26.1812	4.69642	0	#NUM!	0	0	N/A		w1118 #2; 1:2	TBP	27.923	0.255837
	D10	SYBR	M2:20 #2	TBP	2	26.7501	26.1812	4.69642	0	#NUM!	0	0	N/A		w1118 #2; 1:4	TBP	28.6199	0.0874343
	D11	SYBR	M2:20 #3	TBP	1	26.9297	26.1812	4.69642	0	#NUM!	0	0	N/A		w1118 #2; 1:8	TBP	29.5852	0.313499
	D12	SYBR	M2:20 #3	TBP	2	27.0771	26.1812	4.69642	0	#NUM!	0	0	N/A		w1118 #2; 1:2	nrv2	23.144	0.16886
	E01	SYBR	w1118 #1	nrv2	1	21.6689	26.1812	4.69642	0	#NUM!	0	0	N/A		w1118 #2; 1:4	nrv2	24.2933	0.217256
	E02	SYBR	w1118 #1	nrv2	2	21.6751	26.1812	4.69642	0	#NUM!	0	0	N/A		w1118 #2; 1:8	nrv2	25.3872	0.135692
	E03	SYBR	w1118 #2	nrv2	1	21.8526	26.1812	4.69642	0	#NUM!	0	0	N/A
	E04	SYBR	w1118 #2	nrv2	2	21.8759	26.1812	4.69642	0	#NUM!	0	0	N/A
	E05	SYBR	w1118 #3	nrv2	1	22.0211	26.1812	4.69642	0	#NUM!	0	0	N/A			gene	Template dilution	Log template	avg CT	CT stdev	slope	E=10^(-1/slope)
	E06	SYBR	w1118 #3	nrv2	2	21.8844	26.1812	4.69642	0	#NUM!	0	0	N/A		w1118 #2	pb	0.02	-1.69897	29.8126	0.0958678	-3.2449	2.03318
	E07	SYBR	M2:20 #1	nrv2	1	21.7992	26.1812	4.69642	0	#NUM!	0	0	N/A		w1118 #2; 1:2	pb	0.01	-2	31.0354	0.108744
	E08	SYBR	M2:20 #1	nrv2	2	21.8342	26.1812	4.69642	0	#NUM!	0	0	N/A		w1118 #2; 1:4	pb	0.005	-2.30103	31.8974	0.229121
	E09	SYBR	M2:20 #2	nrv2	1	22.2143	26.1812	4.69642	0	#NUM!	0	0	N/A		w1118 #2; 1:8	pb	0.0025	-2.60206	32.7813	0.167275
	E10	SYBR	M2:20 #2	nrv2	2	22.4165	26.1812	4.69642	0	#NUM!	0	0	N/A		w1118 #2	pb2	0.02	-1.69897	30.6663	0.419453	-3.8271	1.82513
	E11	SYBR	M2:20 #3	nrv2	1	22.7013	26.1812	4.69642	0	#NUM!	0	0	N/A		w1118 #2; 1:2	pb2	0.01	-2	32.323	0.279925
	E12	SYBR	M2:20 #3	nrv2	2	22.7901	26.1812	4.69642	0	#NUM!	0	0	N/A		w1118 #2; 1:4	pb2	0.005	-2.30103	32.7564	0.283351
	F01	SYBR	w1118 #1	robl	1	21.9248	26.1812	4.69642	0	#NUM!	0	0	N/A		w1118 #2; 1:8	pb2	0.0025	-2.60206	34.3621	0.207659
	F02	SYBR	w1118 #1	robl	2	22.0305	26.1812	4.69642	0	#NUM!	0	0	N/A		w1118 #2	TBP	0.02	-1.69897	26.4532	0.0284241	-3.3528	1.98728
	F03	SYBR	w1118 #2	robl	1	22.6926	26.1812	4.69642	0	#NUM!	0	0	N/A		w1118 #2; 1:2	TBP	0.01	-2	27.923	0.255837
	F04	SYBR	w1118 #2	robl	2	22.5551	26.1812	4.69642	0	#NUM!	0	0	N/A		w1118 #2; 1:4	TBP	0.005	-2.30103	28.6199	0.0874343
	F05	SYBR	w1118 #3	robl	1	22.76	26.1812	4.69642	0	#NUM!	0	0	N/A		w1118 #2; 1:8	TBP	0.0025	-2.60206	29.5852	0.313499
	F06	SYBR	w1118 #3	robl	2	22.4006	26.1812	4.69642	0	#NUM!	0	0	N/A		w1118 #2	nrv2	0.02	-1.69897	21.8642	0.0164652	-3.8927	1.80672
	F07	SYBR	M2:20 #1	robl	1	22.4116	26.1812	4.69642	0	#NUM!	0	0	N/A		w1118 #2; 1:2	nrv2	0.01	-2	23.144	0.16886
	F08	SYBR	M2:20 #1	robl	2	22.497	26.1812	4.69642	0	#NUM!	0	0	N/A		w1118 #2; 1:4	nrv2	0.005	-2.30103	24.2933	0.217256
	F09	SYBR	M2:20 #2	robl	1	22.7483	26.1812	4.69642	0	#NUM!	0	0	N/A		w1118 #2; 1:8	nrv2	0.0025	-2.60206	25.3872	0.135692
	F10	SYBR	M2:20 #2	robl	2	22.89	26.1812	4.69642	0	#NUM!	0	0	N/A
	F11	SYBR	M2:20 #3	robl	1	23.1246	26.1812	4.69642	0	#NUM!	0	0	N/A			Template dilution	Log template	avg CT	slope	E=10^(-1/slope)
	F12	SYBR	M2:20 #3	robl	2	23.2424	26.1812	4.69642	0	#NUM!	0	0	N/A			0.02	-1.69897	0.0628281	-3.4714	1.94119
	G01	SYBR	w1118 #2; 1:2	pb	1	31.1123	26.1812	4.69642	0	#NUM!	0	0	N/A			0.01	-2	0.254078
	G02	SYBR	w1118 #2; 1:2	pb	2	30.9585	26.1812	4.69642	0	#NUM!	0	0	N/A			0.005	-2.30103	0.0604391
	G03	SYBR	w1118 #2; 1:4	pb	1	31.7354	26.1812	4.69642	0	#NUM!	0	0	N/A			0.0025	-2.60206	0.100229
	G04	SYBR	w1118 #2; 1:4	pb	2	32.0594	26.1812	4.69642	0	#NUM!	0	0	N/A			0.02	-1.69897	0.167275	-3.6376	1.88324
	G05	SYBR	w1118 #2; 1:8	pb	1	32.8996	26.1812	4.69642	0	#NUM!	0	0	N/A			0.01	-2	0.207659
	G06	SYBR	w1118 #2; 1:8	pb	2	32.663	26.1812	4.69642	0	#NUM!	0	0	N/A			0.005	-2.30103	0.255837
	G07	SYBR	w1118 #2; 1:2	pb2	1	32.521	26.1812	4.69642	0	#NUM!	0	0	N/A			0.0025	-2.60206	0.0874343
	G08	SYBR	w1118 #2; 1:2	pb2	2	32.1251	26.1812	4.69642	0	#NUM!	0	0	N/A			0.02	-1.69897	0.279925	-3.4737	1.94034
	G09	SYBR	w1118 #2; 1:4	pb2	1	32.556	26.1812	4.69642	0	#NUM!	0	0	N/A			0.01	-2	0.0284241
	G10	SYBR	w1118 #2; 1:4	pb2	2	32.9568	26.1812	4.69642	0	#NUM!	0	0	N/A			0.005	-2.30103	0.255837
	G11	SYBR	w1118 #2; 1:8	pb2	1	34.5089	26.1812	4.69642	0	#NUM!	0	0	N/A			0.0025	-2.60206	0.0874343
	G12	SYBR	w1118 #2; 1:8	pb2	2	34.2152	26.1812	4.69642	0	#NUM!	0	0	N/A
	H01	SYBR	w1118 #2; 1:2	TBP	1	28.1039	26.1812	4.69642	0	#NUM!	0	0	N/A
	H02	SYBR	w1118 #2; 1:2	TBP	2	27.7421	26.1812	4.69642	0	#NUM!	0	0	N/A
	H03	SYBR	w1118 #2; 1:4	TBP	1	28.6817	26.1812	4.69642	0	#NUM!	0	0	N/A
	H04	SYBR	w1118 #2; 1:4	TBP	2	28.558	26.1812	4.69642	0	#NUM!	0	0	N/A
	H05	SYBR	w1118 #2; 1:8	TBP	1	29.3636	26.1812	4.69642	0	#NUM!	0	0	N/A
	H06	SYBR	w1118 #2; 1:8	TBP	2	29.8069	26.1812	4.69642	0	#NUM!	0	0	N/A
	H07	SYBR	w1118 #2; 1:2	nrv2	1	23.0246	26.1812	4.69642	0	#NUM!	0	0	N/A
	H08	SYBR	w1118 #2; 1:2	nrv2	2	23.2634	26.1812	4.69642	0	#NUM!	0	0	N/A
	H09	SYBR	w1118 #2; 1:4	nrv2	1	24.1397	26.1812	4.69642	0	#NUM!	0	0	N/A
	H10	SYBR	w1118 #2; 1:4	nrv2	2	24.447	26.1812	4.69642	0	#NUM!	0	0	N/A
	H11	SYBR	w1118 #2; 1:8	nrv2	1	25.2913	26.1812	4.69642	0	#NUM!	0	0	N/A
	H12	SYBR	w1118 #2; 1:8	nrv2	2	25.4832	26.1812	4.69642	0	#NUM!	0	0	N/A
[truncated: 4 more columns]

## Sheet: normalization
							normalized to rp49				normalized to TBP				normalized to nrv2
sample	gene	avg TR	sd TR		sample	gene	fold difference	avg	SD	ttest	fold difference	avg	SD	ttest	fold difference	avg	SD	ttest
w1118 #1	rp49	17.9081	0.101902		w1118 #1	rp49	1	1	0	#DIV/0!	392.452	384.875	50.0673	0.339853	2.56193	2.32751	0.220486	0.43231
w1118 #2	rp49	18.2446	0.0936556		w1118 #2	rp49	1				430.722				2.29632
w1118 #3	rp49	18.4409	0.0125463		w1118 #3	rp49	1				331.451				2.12428
M2:20 #1	rp49	18.2429	0.117798		M2:20 #1	rp49	1	1	0		335.197	348.896	16.4476		2.23527	2.20142	0.080492
M2:20 #2	rp49	18.7749	0.022473		M2:20 #2	rp49	1				344.353				2.10953
M2:20 #3	rp49	19.0551	0.323282		M2:20 #3	rp49	1				367.137				2.25946
w1118 #1	pb	30.0146	0.0177759		w1118 #1	pb	8.1095e-05	0.000111513	2.80815e-05	0.488726	0.0318259	0.0424816	0.00958289	0.766838	0.00020776	0.000255425	4.26184e-05	0.534982
w1118 #2	pb	29.8126	0.0958678		w1118 #2	pb	0.000116996				0.0503927				0.000268659
w1118 #3	pb	29.7793	0.00663918		w1118 #3	pb	0.000136449				0.0452263				0.000289856
M2:20 #1	pb	29.565	0.00340856		M2:20 #1	pb	0.000139306	0.000129367	2.93154e-05		0.0466948	0.0448546	0.00869923		0.000311385	0.000283558	5.72143e-05
M2:20 #2	pb	29.9355	0.11825		M2:20 #2	pb	0.000152421				0.0524865				0.000321537
M2:20 #3	pb	30.8434	0.241308		M2:20 #3	pb	9.6374e-05				0.0353825				0.000217754
w1118 #1	pb2	30.5795	0.0715184		w1118 #1	pb2	0.0014741	0.0016085	0.000137477	0.332451	0.578513	0.620982	0.116987	0.82096	0.00377654	0.00373223	0.000308251	0.493181
w1118 #2	pb2	30.6663	0.419453		w1118 #2	pb2	0.00174886				0.753272				0.00401593
w1118 #3	pb2	31.028	0.180866		w1118 #3	pb2	0.00160253				0.531161				0.00340422
M2:20 #1	pb2	30.3974	0.106238		M2:20 #1	pb2	0.0020536	0.0018484	0.000324963		0.68836	0.641427	0.0869794		0.00459034	0.00405898	0.000653111
M2:20 #2	pb2	31.0131	0.113754		M2:20 #2	pb2	0.00201787				0.694858				0.00425676
M2:20 #3	pb2	31.8443	0.131686		M2:20 #3	pb2	0.00147373				0.541062				0.00332984
w1118 #1	TBP	25.9928	0.18753		w1118 #1	TBP	0.00254808	0.00262893	0.000354657	0.362724	1	1	0	#DIV/0!	0.00652801	0.00608945	0.000659253	0.628426
w1118 #2	TBP	26.4532	0.0284241		w1118 #2	TBP	0.00232168				1				0.00533131
w1118 #3	TBP	26.2614	0.0358978		w1118 #3	TBP	0.00301703				1				0.00640902
M2:20 #1	TBP	26.0864	0.103214		M2:20 #1	TBP	0.00298332	0.00287036	0.000133		1	1	0		0.00666852	0.00631629	0.000305364
M2:20 #2	TBP	26.6395	0.156366		M2:20 #2	TBP	0.002904				1				0.00612608
M2:20 #3	TBP	27.0034	0.104192		M2:20 #3	TBP	0.00272378				1				0.00615427
w1118 #1	nrv2	21.672	0.0043885		w1118 #1	nrv2	0.390331	0.432186	0.0403097	0.445752	153.186	165.596	19.0842	0.599859	1	1	0	#DIV/0!
w1118 #2	nrv2	21.8642	0.0164652		w1118 #2	nrv2	0.43548				187.571				1
w1118 #3	nrv2	21.9527	0.0966698		w1118 #3	nrv2	0.470748				156.03				1
M2:20 #1	nrv2	21.8167	0.0247727		M2:20 #1	nrv2	0.447374	0.454665	0.0169481		149.958	158.561	7.45967		1	1	0
M2:20 #2	nrv2	22.3154	0.142936		M2:20 #2	nrv2	0.474039				163.237				1
M2:20 #3	nrv2	22.7457	0.0628281		M2:20 #3	nrv2	0.442583				162.489				1
w1118 #1	robl	21.9776	0.0747952		w1118 #1	robl	0.0349011	0.0318346	0.00359612	0.712782	13.697	12.1837	1.43315	0.485178	0.0894142	0.0743157	0.0133624	0.79793
w1118 #2	robl	22.6238	0.0971995		w1118 #2	robl	0.0278766				12.0071				0.0640135
w1118 #3	robl	22.5803	0.254078		w1118 #3	robl	0.0327261				10.8471				0.0695193
M2:20 #1	robl	22.4543	0.0604391		M2:20 #1	robl	0.0313163	0.0327674	0.00168093		10.4971	11.4339	0.811371		0.0700004	0.0720544	0.00178034
M2:20 #2	robl	22.8192	0.100229		M2:20 #2	robl	0.0346093				11.9178				0.0730095
M2:20 #3	robl	23.1835	0.0833138		M2:20 #3	robl	0.0323765				11.8866				0.0731535
w1118 #2; 1:2	pb	31.0354	0.108744
w1118 #2; 1:4	pb	31.8974	0.229121
w1118 #2; 1:8	pb	32.7813	0.167275								normalized to rp49		normalized to TBP		normalized to nrv2
w1118 #2; 1:2	pb2	32.323	0.279925						sample	gene	avg fold difference	SD	avg fold difference	SD	avg fold difference	SD
w1118 #2; 1:4	pb2	32.7564	0.283351						w1118	rp49	1	0	384.875	50.0673	2.32751	0.220486
w1118 #2; 1:8	pb2	34.3621	0.207659						M2:20	rp49	1	0	348.896	16.4476	2.20142	0.080492
w1118 #2; 1:2	TBP	27.923	0.255837						w1118	pb	0.000111513	2.80815e-05	0.0424816	0.00958289	0.000255425	4.26184e-05
w1118 #2; 1:4	TBP	28.6199	0.0874343						M2:20	pb	0.000129367	2.93154e-05	0.0448546	0.00869923	0.000283558	5.72143e-05
w1118 #2; 1:8	TBP	29.5852	0.313499						w1118	pb2	0.0016085	0.000137477	0.620982	0.116987	0.00373223	0.000308251
w1118 #2; 1:2	nrv2	23.144	0.16886						M2:20	pb2	0.0018484	0.000324963	0.641427	0.0869794	0.00405898	0.000653111
w1118 #2; 1:4	nrv2	24.2933	0.217256						w1118	TBP	0.00262893	0.000354657	1	0	0.00608945	0.000659253
w1118 #2; 1:8	nrv2	25.3872	0.135692						M2:20	TBP	0.00287036	0.000133	1	0	0.00631629	0.000305364
									w1118	nrv2	0.432186	0.0403097	165.596	19.0842	1	0
	gene	Template dilution	Log template	avg CT	CT stdev	slope	E=10^(-1/slope)		M2:20	nrv2	0.454665	0.0169481	158.561	7.45967	1	0
w1118 #2	pb	0.02	-1.69897	29.8126	0.0958678	-3.2449	2.03318		w1118	robl	0.0318346	0.00359612	12.1837	1.43315	0.0743157	0.0133624
w1118 #2; 1:2	pb	0.01	-2	31.0354	0.108744				M2:20	robl	0.0327674	0.00168093	11.4339	0.811371	0.0720544	0.00178034
w1118 #2; 1:4	pb	0.005	-2.30103	31.8974	0.229121
w1118 #2; 1:8	pb	0.0025	-2.60206	32.7813	0.167275
w1118 #2	pb2	0.02	-1.69897	30.6663	0.419453	-3.8271	1.82513			nrv2	nirvana2 - Na/K ATPase
w1118 #2; 1:2	pb2	0.01	-2	32.323	0.279925					robl	roadblock - dynein assoc protein
w1118 #2; 1:4	pb2	0.005	-2.30103	32.7564	0.283351
w1118 #2; 1:8	pb2	0.0025	-2.60206	34.3621	0.207659
w1118 #2	TBP	0.02	-1.69897	26.4532	0.0284241	-3.3528	1.98728
w1118 #2; 1:2	TBP	0.01	-2	27.923	0.255837
w1118 #2; 1:4	TBP	0.005	-2.30103	28.6199	0.0874343
w1118 #2; 1:8	TBP	0.0025	-2.60206	29.5852	0.313499
w1118 #2	nrv2	0.02	-1.69897	21.8642	0.0164652	-3.8927	1.80672
w1118 #2; 1:2	nrv2	0.01	-2	23.144	0.16886
w1118 #2; 1:4	nrv2	0.005	-2.30103	24.2933	0.217256
w1118 #2; 1:8	nrv2	0.0025	-2.60206	25.3872	0.135692
