# Supplementary material for: Disparate expression specificities coded by a shared Hox-C enhancer
Source: eLife. 2020 Apr 28;9:e39876. doi: 10.7554/eLife.39876 (PMC7188484; doi:10.7554/eLife.39876)
Supplement: Figure 5—source data 1. [file elife-39876-fig5-data1.xlsx]

## Sheet: pb intensity scoring
number		area	mean	min	max	random number copied	old file names
35	39	33338	91.57	47	155	35	P1010001.JPG		"old file names" beginning with P refer to M2:20 genotype, those beginning with w are w1118
192	197	43441	144.511	99	187	192	P1010002.JPG		random number was used to randomize and rename the images so the genotype was unknown during image analysis.
128	132	32031	155.026	119	192	128	P1010003.JPG
65	69	34031	164.672	122	206	65	P1010004.JPG
236	242	40824	144.454	109	187	236	P1010005.JPG
74	78	34252	158.111	116	192	74	P1010006.JPG		genotype	mean intensity	avg min	avg max	mean SD	min SD	max SD	ttest mean intensity	ttest min intensity
123	127	27766	162.733	115	207	123	P1010007.JPG		w1118	148.09	100.571	202.183	16.584	22.1271	18.9088	0.00979729	8.84583e-06
94	98	28721	154.684	124	189	94	P1010008.JPG		M2:20	153.454	112.62	200.736	15.797	19.5437	20.3244
186	190	22380	157.73	125	187	186	P1010009.JPG
185	189	37059	127.337	90	174	185	P1010010.JPG
208	213	39388	135.807	90	177	208	P1010011.JPG
187	191	52818	153.509	115	194	187	P1010012.JPG
22	26	23757	148.649	117	184	22	P1010013.JPG
172	176	61131	148.629	111	191	172	P1010014.JPG
177	181	28867	132.204	96	175	177	P1010015.JPG
18	22	30236	166.577	128	199	18	P1010016.JPG
92	96	48099	152.6	114	198	92	P1010017.JPG
110	114	40448	165.745	125	200	110	P1010018.JPG
238	244	21589	158.04	122	202	238	P1010019.JPG
13	17	25270	148.367	94	207	13	P1010020.JPG
71	75	42188	150.256	111	195	71	P1010021.JPG
191	196	32943	176.899	149	201	191	P1010022.JPG
212	217	28677	138.701	98	199	212	P1010023.JPG
130	134	35080	177.191	123	254	130	P1010024.JPG
214	219	33456	164.918	133	199	214	P1010025.JPG
38	42	29259	144.316	94	194	38	P1010026.JPG
203	208	30824	168.914	133	206	203	P1010027.JPG
54	58	49940	139.243	103	193	54	P1010028.JPG
91	95	48367	157.175	121	196	91	P1010029.JPG
103	107	26567	139.508	98	176	103	P1010030.JPG
150	154	23002	165.287	127	203	150	P1010031.JPG
135	139	29325	171.951	132	212	135	P1010032.JPG
60	64	42290	173.509	144	216	60	P1010033.JPG
168	172	22487	170.062	132	212	168	P1010034.JPG
115	119	24056	174.91	138	213	115	P1010035.JPG
222	227	31661	144.068	105	196	222	P1010036.JPG
175	179	45643	155.814	120	196	175	P1010037.JPG
93	97	24779	144.279	108	199	93	P1010038.JPG
220	225	36616	141.491	109	186	220	P1010039.JPG
73	77	33308	140.221	101	178	73	P1010040.JPG
80	84	33929	176.829	138	205	80	P1010041.JPG
237	243	25697	144.561	115	179	237	P1010042.JPG
166	170	19504	181.676	126	228	166	P1010043.JPG
226	231	19682	154.434	114	203	226	P1010044.JPG
25	29	37171	167.6	130	207	25	P1010045.JPG
207	212	47670	145.379	100	188	207	P1010046.JPG
217	222	30130	161.216	121	199	217	P1010047.JPG
7	11	30349	159.209	107	196	7	P1010048.JPG
201	206	34697	158.281	117	208	201	P1010049.JPG
102	106	46514	181.115	141	224	102	P1010050.JPG
198	203	33741	155.559	109	251	198	P1010051.JPG
241	247	37988	145.185	107	181	241	P1010052.JPG
24	28	37927	148.338	78	252	24	P1010053.JPG
106	110	42752	155.865	116	201	106	P1010054.JPG
194	199	37469	169.752	135	215	194	P1010055.JPG
121	125	43991	134.831	97	167	121	P1010056.JPG
29	33	37813	151.154	102	201	29	P1010057.JPG
193	198	25325	167.203	120	217	193	P1010058.JPG
184	188	49719	121.319	67	176	184	P1010059.JPG
137	141	37037	163.347	129	200	137	P1010060.JPG
96	100	34093	177.053	133	209	96	P1010061.JPG
37	41	24714	157.023	122	200	37	P1010062.JPG
173	177	33544	140.414	88	188	173	P1010063.JPG
27	31	51563	109.627	64	160	27	P1010064.JPG
30	34	25888	141.235	106	192	30	P1010065.JPG
179	183	25340	167.846	130	225	179	P1010066.JPG
48	52	41017	166.567	126	208	48	P1010067.JPG
133	137	33946	152.84	117	193	133	P1010068.JPG
32	36	24507	179.608	139	220	32	P1010069.JPG
50	54	49822	143.544	97	197	50	P1010070.JPG
136	140	30229	159.301	120	204	136	P1010071.JPG
132	136	33909	146.139	110	183	132	P1010072.JPG
200	205	27804	150.653	122	182	200	P1010073.JPG
68	72	27382	169.447	141	205	68	P1010074.JPG
144	148	37398	148.56	112	189	144	P1010075.JPG
99	103	36128	160.33	126	206	99	P1010076.JPG
118	122	37449	135.81	98	179	118	P1010077.JPG
157	161	38703	137.459	87	252	157	P1010078.JPG
41	45	27539	156.473	126	193	41	P1010079.JPG
196	201	29310	161.735	131	199	196	P1010080.JPG
66	70	59482	140.684	98	188	66	P1010081.JPG
215	220	45175	153.161	116	196	215	P1010082.JPG
10	14	22142	145.816	75	252	10	P1010083.JPG
229	234	45075	118.122	61	181	229	P1010084.JPG
56	60	26115	162.563	126	212	56	P1010085.JPG
188	193	45872	137.704	73	252	188	P1010086.JPG
148	152	39308	162.048	125	200	148	P1010087.JPG
45	49	65604	159.391	113	209	45	P1010088.JPG
116	120	29397	172.688	131	216	116	P1010089.JPG
151	155	32783	186.705	154	216	151	P1010090.JPG
55	59	41930	132.787	93	171	55	P1010091.JPG
120	124	31956	165.329	124	201	120	P1010092.JPG
165	169	49038	134.958	83	252	165	P1010093.JPG
20	24	47374	145.723	102	187	20	P1010094.JPG
6	10	42963	139.324	104	182	6	P1010095.JPG
111	115	27897	149.451	114	188	111	P1010096.JPG
83	87	33335	163.216	122	206	83	P1010097.JPG
210	215	33310	138.345	102	183	210	P1010098.JPG
246	252	32450	164.247	120	208	246	P1010099.JPG
47	51	34545	169.398	138	195	47	P1010100.JPG
98	102	35226	142.765	94	181	98	P1010101.JPG
224	229	33639	136.137	87	190	224	P1010102.JPG
213	218	30321	178.569	141	211	213	P1010103.JPG
231	236	32895	172.804	138	207	231	P1010104.JPG
125	129	37024	143.652	102	183	125	P1010105.JPG
90	94	43676	162.183	121	205	90	P1010106.JPG
204	209	27199	158.254	123	254	204	P1010107.JPG
77	81	31076	154.241	105	206	77	P1010108.JPG
190	195	35015	140.389	103	195	190	P1010109.JPG
36	40	50959	137.85	100	171	36	P1010110.JPG
221	226	46932	154.349	106	187	221	P1010111.JPG
67	71	39202	159.645	115	206	67	P1010112.JPG
119	123	51376	179.713	135	212	119	P1010113.JPG
161	165	22121	171.347	138	215	161	P1010114.JPG
58	62	52385	132.058	92	253	58	P1010115.JPG
43	47	50355	129.044	72	250	43	P1010116.JPG
31	35	29327	137.891	92	184	31	P1010117.JPG
59	63	66308	143.199	91	188	59	P1010118.JPG
34	38	52119	161.58	126	200	34	P1010119.JPG
4	8	33060	160.18	126	197	4	P1010120.JPG
16	20	34563	156.248	125	190	16	P1010121.JPG
44	48	49695	139.254	90	192	44	w1010001.JPG
209	214	48361	142.874	86	206	209	w1010002.JPG
39	43	52714	159.803	113	212	39	w1010003.JPG
3	7	31156	136.269	92	199	3	w1010004.JPG
17	21	22972	158.198	121	203	17	w1010005.JPG
117	121	49383	154.456	109	202	117	w1010006.JPG
216	221	53946	161.868	123	213	216	w1010007.JPG
84	88	48680	142.013	88	192	84	w1010008.JPG
114	118	50035	159.021	110	195	114	w1010009.JPG
70	74	42859	128.952	68	231	70	w1010010.JPG
225	230	43385	145.04	105	187	225	w1010011.JPG
21	25	52365	163.099	115	206	21	w1010012.JPG
19	23	29661	164.458	129	210	19	w1010013.JPG
14	18	36784	168.953	129	206	14	w1010014.JPG
112	116	29088	182.299	139	236	112	w1010015.JPG
153	157	49454	144.56	98	184	153	w1010016.JPG
152	156	47281	142.36	92	183	152	w1010017.JPG
178	182	55869	112.907	69	166	178	w1010018.JPG
12	16	66418	124.182	73	180	12	w1010019.JPG
139	143	53028	156.573	98	203	139	w1010020.JPG
64	68	56624	148.017	104	195	64	w1010021.JPG
211	216	43604	143.366	99	193	211	w1010022.JPG
1	4	43067	134.965	89	181	1	w1010023.JPG
147	151	31321	115.552	53	180	147	w1010024.JPG
164	168	50432	150.633	110	198	164	w1010025.JPG
61	65	41953	179.246	143	211	61	w1010026.JPG
57	61	46755	143.46	98	204	57	w1010027.JPG
160	164	46866	168.656	125	224	160	w1010028.JPG
143	147	34625	164.908	131	213	143	w1010029.JPG
149	153	51562	160.902	118	252	149	w1010030.JPG
49	53	51876	165.575	114	214	49	w1010031.JPG
223	228	47874	162.818	114	214	223	w1010032.JPG
182	186	47630	137.748	95	190	182	w1010033.JPG
69	73	34975	139.642	81	228	69	w1010034.JPG
87	91	66387	110.716	58	163	87	w1010035.JPG
155	159	39001	149.35	104	212	155	w1010036.JPG
245	251	37621	130.353	85	208	245	w1010037.JPG
85	89	43535	142.848	91	205	85	w1010038.JPG
108	112	39830	139.371	79	195	108	w1010039.JPG
82	86	44054	172.457	137	212	82	w1010040.JPG
140	144	28940	158.785	121	207	140	w1010041.JPG
189	194	49586	161.73	116	210	189	w1010042.JPG
141	145	44608	143.262	99	184	141	w1010043.JPG
195	200	38555	176.1	125	212	195	w1010044.JPG
129	133	30425	186.163	132	227	129	w1010045.JPG
219	224	42098	138.026	83	200	219	w1010046.JPG
52	56	62278	94.058	12	229	52	w1010047.JPG
234	240	27362	183.261	138	227	234	w1010048.JPG
131	135	44869	151.976	107	194	131	w1010049.JPG
233	238	47109	166.143	126	199	233	w1010050.JPG
227	232	46033	141.828	80	224	227	w1010051.JPG
8	12	34545	115.089	69	179	8	w1010052.JPG
124	128	25697	139.247	77	219	124	w1010053.JPG
62	66	48084	129.255	73	191	62	w1010054.JPG
169	173	53560	155.929	115	195	169	w1010055.JPG
146	150	51738	152.805	109	192	146	w1010056.JPG
156	160	33074	155.008	122	195	156	w1010057.JPG
176	180	38005	128.933	86	181	176	w1010058.JPG
206	211	56819	139.617	91	185	206	w1010059.JPG
171	175	33841	135.098	70	235	171	w1010060.JPG
232	237	30835	118.69	61	192	232	w1010061.JPG
88	92	44426	166.589	122	229	88	w1010062.JPG
170	174	32434	142.516	77	221	170	w1010063.JPG
89	93	41997	170.618	132	206	89	w1010064.JPG
218	223	26554	163.833	118	216	218	w1010065.JPG
40	44	45115	150.13	100	206	40	w1010066.JPG
23	27	56104	159.593	117	206	23	w1010067.JPG
15	19	64609	133.235	79	181	15	w1010068.JPG
174	178	46523	144.809	88	208	174	w1010069.JPG
163	167	29079	151.156	105	205	163	w1010070.JPG
242	248	54093	143.207	100	187	242	w1010071.JPG
247	253	26466	162.607	112	199	247	w1010072.JPG
107	111	22340	161.644	120	205	107	w1010073.JPG
72	76	57580	138.273	78	192	72	w1010074.JPG
113	117	18274	181.967	142	218	113	w1010075.JPG
181	185	61118	119.424	61	252	181	w1010076.JPG
63	67	28622	158.547	123	191	63	w1010077.JPG
228	233	54510	136.298	80	186	228	w1010078.JPG
235	241	52138	146.815	77	199	235	w1010079.JPG
154	158	56709	133.209	88	183	154	w1010080.JPG
53	57	62117	132.712	92	176	53	w1010081.JPG
95	99	86920	163.851	128	204	95	w1010082.JPG
11	15	28770	145.211	52	243	11	w1010083.JPG
239	245	51621	153.603	105	200	239	w1010084.JPG
78	82	50199	149.731	109	203	78	w1010085.JPG
240	246	58986	147.126	95	199	240	w1010086.JPG
79	83	28878	168.437	129	214	79	w1010087.JPG
199	204	39068	146.657	113	185	199	w1010088.JPG
126	130	43287	132.385	78	195	126	w1010089.JPG
127	131	30763	164.831	126	252	127	w1010090.JPG
105	109	55662	130.183	84	183	105	w1010091.JPG
180	184	28124	171.879	135	205	180	w1010092.JPG
86	90	45909	132.261	88	193	86	w1010093.JPG
104	108	40004	144.63	91	252	104	w1010094.JPG
100	104	34201	155.953	97	251	100	w1010095.JPG
42	46	49699	164.156	106	226	42	w1010096.JPG
97	101	40823	132.302	75	199	97	w1010097.JPG
9	13	35346	137.169	90	187	9	w1010098.JPG
142	146	29587	153.805	109	214	142	w1010099.JPG
138	142	43772	152.393	114	187	138	w1010100.JPG
109	113	41841	153.529	114	198	109	w1010101.JPG
101	105	31830	168.82	120	233	101	w1010102.JPG
2	6	61641	147.245	108	186	2	w1010103.JPG
244	250	40642	136.617	103	172	244	w1010104.JPG
26	30	61996	138.347	77	217	26	w1010105.JPG
134	138	48604	157.066	114	213	134	w1010106.JPG
183	187	51191	132.541	86	181	183	w1010107.JPG
167	171	47465	149.939	104	194	167	w1010108.JPG
28	32	57975	140.036	95	184	28	w1010109.JPG
46	50	63752	148.124	105	210	46	w1010110.JPG
158	162	49210	167.48	130	206	158	w1010111.JPG
202	207	43244	162.479	126	204	202	w1010112.JPG
51	55	44190	126.408	76	184	51	w1010113.JPG
5	9	35073	163.576	110	207	5	w1010114.JPG
159	163	62492	156.927	121	214	159	w1010115.JPG
145	149	42099	146.24	100	181	145	w1010116.JPG
243	249	52747	113.812	71	160	243	w1010117.JPG
197	202	50886	146.965	105	197	197	w1010118.JPG
162	166	76886	126.838	78	174	162	w1010119.JPG
230	235	41055	138.911	93	184	230	w1010120.JPG
81	85	57257	140.364	104	184	81	w1010121.JPG
33	37	56720	148.96	107	188	33	w1010122.JPG
205	210	43729	128.26	84	178	205	w1010123.JPG
75	79	45241	156.365	102	209	75	w1010124.JPG
122	126	63227	146.417	104	191	122	w1010125.JPG
76	80	49057	154.649	113	193	76	w1010126.JPG

## Sheet: zen2 in situ scoring
embryos of the appropriate stages and with embryo orientation and staining amenable to characterization were counted according to the categories below. For simplification, embryos with any staining at the poles was categorized as "polar."
stage 4						stage 5
dorsal-weak	dorsal-strong	poles+dorsal	poles-strong	poles-weak	no expression	dorsal-weak	dorsal-strong	poles+dorsal	poles-strong	poles-weak	no expression	genotype
0	0	24	59	145	10	26	14	1	1	30	19	w1118
0	0	9	35	87	4	8	0	0	0	17	46	pb[M2:20]
	dorsal	%	polar	%	% none		dorsal		polar		% none
	0	0	228	0.957983	0.0420168		40	0.43956	32	0.351648	0.208791	w1118
	0	0	131	0.97037	0.0296296		8	0.112676	17	0.239437	0.647887	pb[M2:20]
	dorsal	% dorsal	polar	% polar	% none		dorsal	% dorsal	polar	% polar	% none
	0	0	228	0.957983	0.0420168		40	0.43956	32	0.351648	0.208791	w1118
	0	0	131	0.97037	0.0296296		8	0.112676	17	0.239437	0.647887	pb[M2:20]
		stage 4			stage 5
		dorsal	polar	none	dorsal	polar	none	genotype
		0	0.957983	0.0420168	0.43956	0.351648	0.208791	w1118
		0	0.97037	0.0296296	0.112676	0.239437	0.647887	pb[M2:20]
