# Supplementary material for: Disparate expression specificities coded by a shared Hox-C enhancer
Source: eLife. 2020 Apr 28;9:e39876. doi: 10.7554/eLife.39876 (PMC7188484; doi:10.7554/eLife.39876)
Supplement: Figure 6—figure supplement 1—source data 1. [file elife-39876-fig6-figsupp1-data1.xlsx]

## Sheet: Sheet1
Species	pb scaffold	Hox3/zen scaffold, if applicable	Search Database (alternate search term)
Drosophila melanogaster	GI#671162122	same	Entrez (drosophila melanogaster pb)
Drosophila ananassae	GI#194746758	same	Entrez (GF17798)
Drosophila pseudoobscura	GI#482682714	same	Entrez (Dpse\pb)
Drosophila willistoni	GI#195446537	same	Entrez (LOC6647274)
Drosophila virilis	GI#195392526	same	Entrez(GJ23937)
Drosophila grimshawi	GI#195039367	same	Entrez (GH19484)
Lucilia cuprina	GI#906475348	same	Entrez (FF38_01942)
Bactrocera dorsalis	GI#751403771	GI#751405734 GI#751403794 (Dfd)	Entrez (LOC105222628; LOC105234025; LOC105222074)
Ceratitis capitata	GI#1308265176	same	Entrez (LOC101459645)
Proctacanthus coquilletti	GI#1127585404	same	Entrez (MNCL01000017.1)
Mayetiola destructor	maydes_A1.1	same	i5k.nal.usda.gov
Belgica antarctica	GI#676160574	same	Entrez (JPYR01000452)
Anopheles gambiae	GI#116234532	same	Entrez (AgaP_AGAP004648)
Aedes aegypti	GI#1211211993	same	Entrez (LOC5566256)
Culex quinquefasciatus	GI#170029772	same	Entrez (CpipJ_CPIJ001002)
Limnephilus lunatus	Scaffold2047	Scaffold5407	i5k.nal.usda.gov
Manduca sexta	GI#388482201	same	Entrez (JH668442.1)
Bombyx mori	GI#186891093	same	Entrez (Bombyx scaf11)
Heliothis virescens	GI#1247033588	GI#1247023646	Entrez (B5V51_3659; NWSH01005891.1)
Amyelois transitella	GI#912581944	same	Entrez (LOC106137652)
Danaus plexippus	GI#357950661	same	Entrez (JH384979)
Nicrophorus vespilloides	GI#1058395725	GI#1058394199 GI#1058395962	Entrez (NW_017096817.1; NW_017098343.1; NW_017096580.1)
Agrilus planipennis	GI#1434348259	same	Entrez (LOC108734881)
Tribolium castaneum	GI#1005928704	same	Entrez (Mxp)
Aethina tumida	GI#1131736814 (NW_017853707.1)	GI#1131736876 (NW_017853645.1)	Entrez
Anoplophora glabripennis	GI#1315557593	GI#1315557593; GI#1315558543	Entrez (LOC108904419; LOC108910837)
Leptinotarsa decemlineata	Scaffold63	same	i5k.nal.usda.gov
Dendroctonus ponderosae	GI#478262671	GI#478256401	Entrez (YQE_02372; YQE_06899)
Pediculus humanus corporis	GI#242011875	same	Entrez (PHUM266910)
Neodiprion lecontei	GI#914281250	same	Entrez (LGIB01000018.1)
Athalia rosae	GI#1421153951	same	Entrez (LOC105687858)
Cephus cinctus	GI#932520272	same	Entrez (LOC107270161)
Orussus abietinus	GI#131527425	same	Entrez (LOC105697510)
Microplitis demolitor	GI#938310906	same	Entrez (LOC103568619)
Diachasma alloeum	GI#969994116	same	Entrez (LOC107039061)
Fopius arisanus	GI#755455525	same	Entrez (LOC105269352)
Trichogramma pretiosum	GI#1318358180	same	Entrez (LOC106649312)
Copidosoma floridanum	GI#1315026221	same	Entrez (LOC106647278)
Nasonia vitripennis	GI#63947611	same	Entrez (LOC100120119)
Harpegnathos saltator	GI#307213481	same	Entrez (EAI_10866)
Linepithema humile	GI#812876822	same	Entrez (LOC105674090)
Pogonomyrmex barbatus	GI#759027675	same	Entrez (scf7180000350303)
Solenopsis invicta	GI#750047441	N/A	Entrez (LOC105192852)
Cardiocondyla obscurior	scf0046	N/A	hymenopteragenome.org (Cobs_01888)
Atta cephalotes	GI#799073457	N/A	Entrez (LOC105617535)
Dufourea novaeangliae	GI#987437531	same	Entrez (LOC107185326)
Lasioglossum albipes	GI#469639767	same	Entrez (KB639615.1)
Euglossa dilemma	GI#1208455747	same	Entrez (NIJG01000008.1)
Bombus impatiens	GI#347559753	same; Dfd found on GI#347559850	Entrez (JH157942; JH157845)
Habropoda laboriosa	GI#915659841	same	Entrez (KQ414721.1)
Apis mellifera	GI#323388972	same	Entrez (LOC410648)
Melipona quadrifasciata	GI#925681859	same	Entrez (KQ435720.1)
Frankliniella occidentalis	Scaffold11	same	i5k.nal.usda.gov
Homalodisca vitripennis	Scaffold790	same	i5k.nal.usda.gov
Gerris buenoi	Scaffold917	same	i5k.nal.usda.gov
Oncopeltus fasciatus	Scaffold1294	Scaffold21	i5k.nal.usda.gov
Halyomorpha halys	GI#1358701992	same	Entrez (LOC106685661)
Cimex lectularius	GI#1315226472	same	Entrez (LOC106661548)
Rhodnius prolixus	GI#313783662	same	Entrez (GL563154)
Acyrthosiphon pisum	gl349666	same	Ensembl Metazoa
Diaphorina citri	GI#645507914	same	Entrez (LOC103524705)
Bemisia tabaci	GI#1099287370	same	Entrez (LOC109033911)
Blattella germanica	GI#1370627879	GI#1370638091	Entrez (blattella germanica scaffold1136; scaffold415)
Zootermopsis nevadensis	GI#646716007	same	Entrez (L798_06191)
Locusta migratoria	Scaffold215803	Scaffold181338	i5k.nal.usda.gov
Ephemera danica	Scaffold993	same	i5k.nal.usda.gov
Ladona fulva	Scaffold86	same	i5k.nal.usda.gov
Catajapyx aquilonaris	scaffold9702_cov93	scaffold6580_cov95	i5k.nal.usda.gov
Folsomia candida	GI#1227487960	same	Entrez (LOC11084891)
Orchesella cincta	Scaffold0563	same	http://www.collembolomics.nl/
Daphnia pulex	GI#321475518	same	Entrez (dappuscaffold_7)
Hyalella azteca	Scaffold38	same	i5k.nal.usda.gov
Lepeophtheirus salmonis	LSalAtl2s356	N/A	Ensembl Metazoa
Tigriopus californicus	Scaffold_103 (pb absent)	N/A	i5k.nal.usda.gov
Strigamia maritima	GI#365220699	N/A	Entrez (JH431446)
Centruroides exilicauda	Scaffold891 Scaffold1174 Scaffold232	N/A N/A Scaffold232	i5k.nal.usda.gov
Parasteatoda tepidariorum	Scaffold854 Scaffold196	N/A same	i5k.nal.usda.gov
Stegodyphus mimosarum	GI#605038185 GI#605031193	same same	Entrez (KK112484; KK119213)
Tetranychus urticae	scaffold_11 (GI#364345574)	N/A	Entrez (HE587311)
Ixodes scapularis	GI#183696984	same	Entrez (DS891538)
Limulus polyphemus	GI#924274441 GI#924270834 GI#924266269	same same GI#924271933	Entrez (LOC106461797; LOC106470729; LOC106470729; LOC111088079)
