# Supplementary material for: Disparate expression specificities coded by a shared Hox-C enhancer
Source: eLife. 2020 Apr 28;9:e39876. doi: 10.7554/eLife.39876 (PMC7188484; doi:10.7554/eLife.39876)
Supplement: Supplementary file 2. — A list of 40 random 12-mers analyzed for instances of occurrence and conservation between different species. We also picked a random set of 10 12-mers based upon conservation within the large pb intron between D. melanogaster and D. ananassae for patterns of extended conservation in Schizophora. Only one of the ananassae 12-mers shows conservation beyond D. grimshawi. [file elife-39876-supp2.xlsx]

## Sheet: Sheet1
species	pb region sequence analyzed		category	motif		# instances	1 instance per X bp	pattern
Dmel	159167		random 12mer	GCATAGTGTTAC		8	287514	8 instances, no conservation
Dana	139402		random 12mer	ACCAAAGGCTGC		7	328587	7 instances, no conservation
Dpse	158293		random 12mer	GCGACTGCTAGG		5	460022	5 instances, no conservation
Dwil	214630		random 12mer	AAACGCCCGCGG		0	2300109	0 instances
Dvir	202286		random 12mer	GGGTCTCCCGAC		1	2300109	1 instance
Dgri	170896		random 12mer	ATACACAGACTA		5	460022	5 instances, no conservation
Lcup	372202		random 12mer	CTGGAAACATGA		11	209101	11 instances, no conservation
Ccap	533902		random 12mer	TGCCTTCAATGA		12	191676	12 instances, no conservation
Bdor	349331		random 12mer	ACAGCACGATCG		2	1.15005e+06	2 instances, no conservation
	2300109		random 12mer	TTTTAAAGGTCC		20	115005	20 instances, no conservation
			random 12mer	AGTCAAATATAA		27	85189.2	27 instances , no conservation
			random 12mer	CCGTTAAGTAGG		2	1.15005e+06	2 instances, no conservation
			random 12mer	GAGAAAGCAGCT		13	176931	13 instances, no conservation
			random 12mer	ATTACTTTGCTG		17	135301	17 instances, site in Dfd conserved melanogaster to virilis
			random 12mer	TTGTAATCCACC		4	575027	4 instances, no conservation
			random 12mer	GCAGAGGCTCCC		1	2300109	1 instance
			random 12mer	AATGGCATTCTG		17	135301	17 instance, no conservation
			random 12mer	GCTAGAGTATCC		2	1.15005e+06	2 instances, no conservation
			random 12mer	GTAACCTTACGC		0	2300109	0 instances
			random 12mer	AATGGCATCAAG		4	575027	4 instances, no conservation
			random 12mer	AGTTGTATTGCG		8	287514	8 instances, no conservation
			random 12mer	CCCAAGGTAACT		1	2300109	1 instance
			random 12mer	TTCGCGAGACCA		2	1.15005e+06	2 instances
			random 12mer	ATTTTGTATAGG		35	65717.4	35 instances, no conservation
			random 12mer	CGATTGGGGGAA		6	383352	6 instances, no conservation
			random 12mer	CCCATCACGACC		3	766703	3 instances, no conservation
			random 12mer	TGAGTTGGTGCG		10	230011	10 instances, no conservation
			random 12mer	GTCGGGGACGAC		2	1.15005e+06	2 instances
			random 12mer	ACCGCGTATAGC		2	1.15005e+06	2 instances
			random 12mer	CATTTCACGACC		2	1.15005e+06	2 instances
			random 12mer	TAATTCAAGCTC		12	191676	12 instances, no conservation
			random 12mer	TTTTGTTCGCAC		13	176931	13 instances, no conservation
			random 12mer	TAGCAACTAAGG		2	1.15005e+06	2 instances
			random 12mer	CGTGTCTACAAT		4	575027	4 instances
			random 12mer	TCAGCACTTACA		7	328587	7 instances
			random 12mer	GAGGTGGTTCAG		4	575027	4 instances
			random 12mer	CTCAGTACCCCA		1	2300109	1 instance
			random 12mer	GTACTTATCTTT		14	164294	14 instances, no conservation
			random 12mer	AATGACATAGAC		13	176931	13 instances, 1 instance between Ama & Dfd conserved in Dana, Dpse, Dvir, Dgri only
			random 12mer	GATCTGACCAAT		10	230011	10 instances, no conservation
			ananassae 12mer	CTGAAAAGTAAA		54	42594.6	54 instances, 1 intron motif conserved melanogaster to grimshawii
			ananassae 12mer	CAACAAGGTGGA		11	209101	11 instances; 1 intron motif conserved melanogaster to pse, gri & will
			ananassae 12mer	TAAATTAGAGAA		56	41073.4	56 instances; 1 intron motif conserved melanogaster to grimshawii
			ananassae 12mer	CAATGGAAAATT		60	38335.2	60 instances; 1 intron motif conserved grimshawii to B. dorsalis; 1 intron motif conserved melanogaster to grimshawii
			ananassae 12mer	ATTGCTGATGAG		17	135301	17 instances; 1 intron motif conserved melanogaster to grimshawii
			ananassae 12mer	TTCCATTTGTCT		37	62165.1	37 instances; 1 intron motif conserved melanogaster to grimshawii
			ananassae 12mer	ACATGGCGTATG		11	209101	11 instances; 1 intron motif conserved melanogaster to grimshawii
			ananassae 12mer	TGGCAAAGACAT		11	209101	11 instances; 1 intron motif conserved melanogaster to pse;
			ananassae 12mer	ACCTAGATTTGG		15	153341	15 instances; 1 intron motif conserved melanogaster to grimshawii
			ananassae 12mer	TAAATTAGAAGA		38	60529.2	38 instances; 1 intron motif conserved melanogaster to pse
						avg occurance, random 12mers	772189
						avg occurance, ananassae 12mers	116064
						total avg occurance	640964
